# Supplementary figures and images for: The Availability of a Recombinant Anti-SNAP Antibody in VHH Format Amplifies the Application Flexibility of SNAP-Tagged Proteins
Source: Hindawi journal article supplement (doi:10.1155/2010/658954), 2010-01-01

Supplementary Figure 1

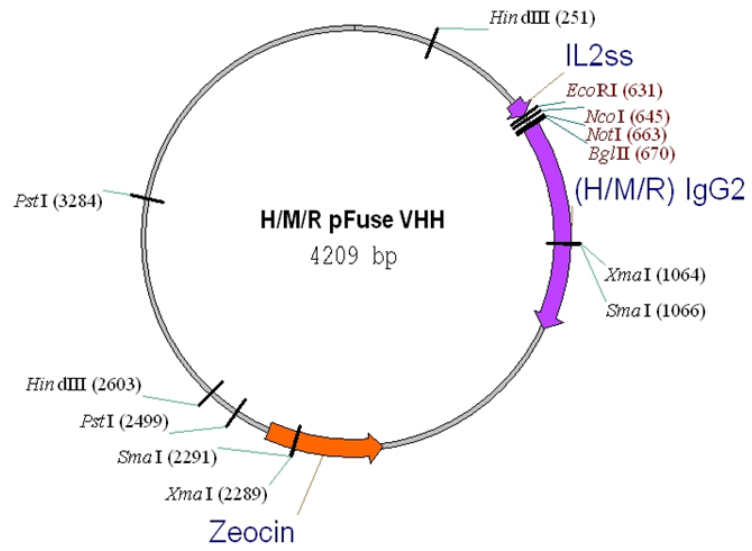

Supplement: f1 [file 658954.f1.pdf]

Supplementary Figure 2

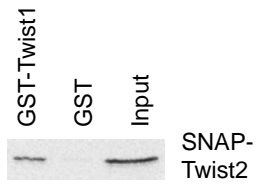

Supplement: f2 [file 658954.f2.pdf]

Supplementary Figure 3

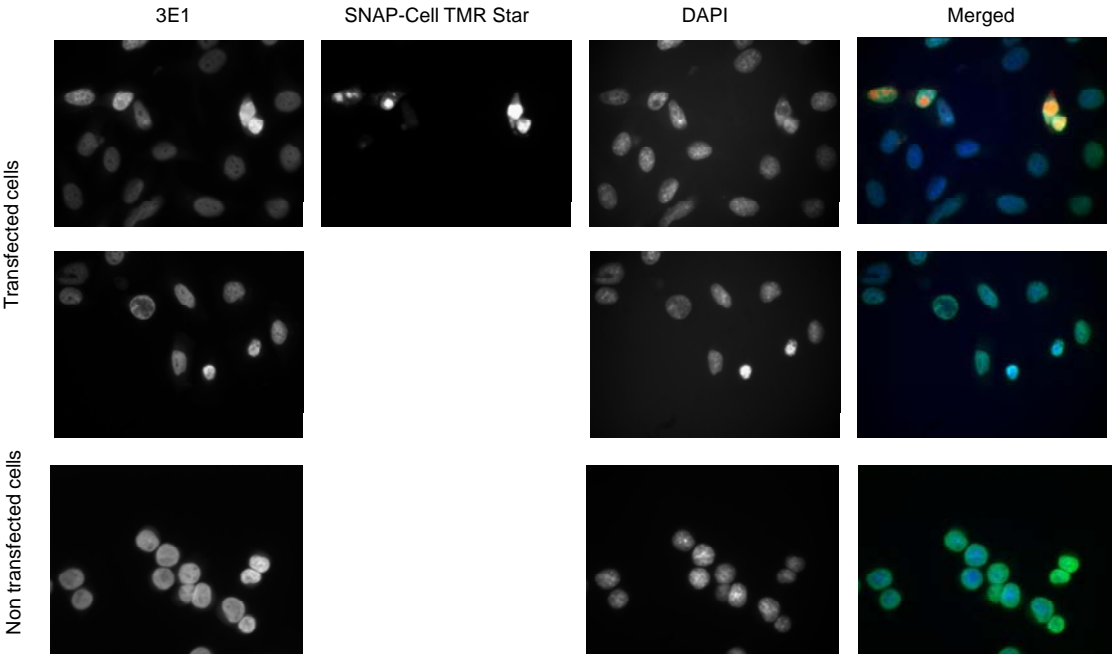

Supplement: f3 [file 658954.f3.pdf]
